# Supplementary material
Source: PubMed Central journal article supplement (PMC7914200)
Supplement: NIHMS1651134-supplement-1.pdf [file NIHMS1651134-supplement-1.pdf]

| Demographics                                                                                                                 |                  |                               |           |                 |             |               |
|------------------------------------------------------------------------------------------------------------------------------|------------------|-------------------------------|-----------|-----------------|-------------|---------------|
| <i>To be completed by practitioner and/or with the family</i>                                                                |                  |                               |           |                 |             |               |
| Patient Name                                                                                                                 |                  | Caregiver Name                |           | Caregiver Role  |             | Date          |
| Diagnosis                                                                                                                    |                  |                               |           | Age             |             | Grade         |
| School Name                                                                                                                  |                  |                               |           | School Contact  |             |               |
| Type of School                                                                                                               | Public           | Private                       | Charter   | Online          | Home School | Pre-K/Daycare |
| Length of Time in Current School                                                                                             |                  |                               |           |                 |             |               |
| Academic Information                                                                                                         |                  |                               |           |                 |             |               |
| <i>To be completed by practitioner and/or with the family</i>                                                                |                  |                               |           |                 |             |               |
| Instructions to parent: Please respond to the following items based on your child's CURRENT status. Describe your child's... |                  |                               |           |                 |             |               |
| School strengths                                                                                                             |                  |                               |           |                 |             |               |
| School weaknesses                                                                                                            |                  |                               |           |                 |             |               |
| Average grades/GPA/ current academic standing (i.e., is your child behind with his/her school work, etc.?)                   |                  |                               |           |                 |             |               |
| School schedule and Classroom setting (i.e., honors/AP, resource room, etc.)                                                 |                  |                               |           |                 |             |               |
| Formal school plan                                                                                                           | IEP/ISP          | 504/<br>Accommodation<br>Plan | IHP       | None            |             |               |
| Approximate # of absences                                                                                                    | 0-5              | 6-10                          | 11-15     | 16+             |             |               |
| Has your child undergone a neuropsychological evaluation?                                                                    | Yes              |                               | No        | Referral Needed |             |               |
| Physical and Health Management at School                                                                                     |                  |                               |           |                 |             |               |
| <i>To be completed by practitioner and/or with the family</i>                                                                |                  |                               |           |                 |             |               |
| Instructions to parent: Please respond to the following items based on your child's CURRENT status. Does your child...       |                  |                               |           |                 |             |               |
| Have access to a school nurse in his/her building?                                                                           | Part-time        |                               | Full-Time |                 | No          |               |
| Need medication at school?                                                                                                   | If yes, specify: |                               |           |                 |             |               |

| Physical and Health Management at School                                                                                                                                                                            |                 |             |                                |                          |                  |                   |
|---------------------------------------------------------------------------------------------------------------------------------------------------------------------------------------------------------------------|-----------------|-------------|--------------------------------|--------------------------|------------------|-------------------|
| <i>To be completed by practitioner and/or with the family</i>                                                                                                                                                       |                 |             |                                |                          |                  |                   |
| Instructions to parent: Please respond to the following items based on your child's CURRENT status.                                                                                                                 |                 |             |                                |                          |                  |                   |
| Does your child...                                                                                                                                                                                                  |                 |             |                                |                          |                  |                   |
| Receive special/related services?                                                                                                                                                                                   | OT              | PT          | Speech                         | Transportation           |                  |                   |
| Have access to an elevator at school?                                                                                                                                                                               | Yes             | No          |                                | N/A                      |                  |                   |
| Other medical information                                                                                                                                                                                           |                 |             |                                |                          |                  |                   |
| Psychosocial Information for School                                                                                                                                                                                 |                 |             |                                |                          |                  |                   |
| <i>To be completed by practitioner and/or with the family</i>                                                                                                                                                       |                 |             |                                |                          |                  |                   |
| Instructions to parent: Please respond to the following items based on your child's CURRENT status.                                                                                                                 |                 |             |                                |                          |                  |                   |
| Additional information about your child...                                                                                                                                                                          |                 |             |                                |                          |                  |                   |
| Interests or extracurricular activities                                                                                                                                                                             |                 |             |                                |                          |                  |                   |
| Siblings (name/age/school for each sibling, etc.)                                                                                                                                                                   |                 |             |                                |                          |                  |                   |
| Risk Assessment                                                                                                                                                                                                     |                 |             |                                |                          |                  |                   |
| <i>To be completed by practitioner with the family</i>                                                                                                                                                              |                 |             |                                |                          |                  |                   |
| Do you or anyone else (i.e., child, child's school, child's care team, etc.) have concerns about:                                                                                                                   | Yes Anticipated | Yes Current | Yes Prior Concern (Unresolved) | Not an Issue or Resolved | Retention Notes: | Retention Total:  |
| Your child repeating a grade? (i.e., was "held back" or is at risk for being "held back")                                                                                                                           | +1              | +2          | +2                             | +0                       |                  |                   |
| Your child's school attendance? (i.e., frequent late arrivals, early departure, partial day attendance, or full day absences that impact academic progress, and/or your child's access to quality home instruction) | +3              | +4          | +3                             | +0                       | Attendance Notes | Attendance Total: |

<sup>1</sup>Prior concern, unresolved: Refers to a problem or concern that occurred in the past that is no longer a current issue, yet has had lasting effects on the student's education

| Risk Assessment                                                                                                                              |                                                                                |             |                                |                          |                        |                            |
|----------------------------------------------------------------------------------------------------------------------------------------------|--------------------------------------------------------------------------------|-------------|--------------------------------|--------------------------|------------------------|----------------------------|
| <i>To be completed by practitioner with the family</i>                                                                                       |                                                                                |             |                                |                          |                        |                            |
| Do you or anyone else (i.e., child, child's school, child's care team, etc.) have concerns about:                                            | Yes Anticipated                                                                | Yes Current | Yes Prior Concern (Unresolved) | Not an Issue or Resolved | Academic Notes         | Academic Performance Total |
| Your child's school/academic performance?                                                                                                    | +3                                                                             | +4          | +3                             | +0                       |                        |                            |
| School supports or accommodations for your child? (e.g., extra time, small group instruction, frequent breaks, special transportation, etc.) | +2                                                                             | +4          | +3                             | +0                       | Accommodation Notes    | Accommodation Total:       |
| Your child's peer relationships? (i.e., making or keeping friends, interacting with same-age peers, etc.)                                    | +0                                                                             | +1          | +1                             | +0                       | Social/Emotional Notes | Social/Emotional Total:    |
| Your child's emotions or behavior at school?                                                                                                 | +1                                                                             | +3          | +2                             | +0                       |                        |                            |
| Your comfort level and/or ability to explain your child's medical and/or educational needs in the school setting?                            | +1                                                                             | +2          | +1                             | +0                       | Parent Readiness Notes | Parent Readiness Total:    |
| <b>BSNI Total:</b>                                                                                                                           | <b>Risk Score Range:</b><br><b>E1 [0 -6 ]      E2 [7 -13 ]      E3[14 -20]</b> |             |                                |                          |                        |                            |

<sup>1</sup>Prior concern, unresolved: Refers to a problem or concern that occurred in the past that is no longer a current issue, yet has had lasting effects on the student's education

**Education Risk Calculation**

*To be completed by practitioner (School Intervention Specialist). Using input and considerations from the patient's care team (i.e., medical and/or psychosocial care providers) and other available sources (e.g., medical records, prior school history when known, etc.), how would you best describe...*

|                                                                                                                                       |                                                                                                |                                                                              |                                                                                               |
|---------------------------------------------------------------------------------------------------------------------------------------|------------------------------------------------------------------------------------------------|------------------------------------------------------------------------------|-----------------------------------------------------------------------------------------------|
| <b>The family's preparedness relative to school advocacy/need for support?</b>                                                        | <b>Low (+0)</b><br>Family is empowered to self-advocate                                        | <b>Moderate (+1)</b><br>Family needs some support with advocacy              | <b>High (+2)</b><br>Family may be at risk without targeted interventions                      |
| <b>The patient's current health status as it may impact school participation?</b>                                                     | <b>Chronic (+0)</b><br>Off treatment or indefinite treatment but stable with routine follow-up | <b>Active (+1)</b><br>Stable but receiving treatment with frequent follow up | <b>Acute (+2)</b><br><i>Recent trauma/serious medical incident/current complex care needs</i> |
| <b>The patient's education risk?</b>                                                                                                  | <b>Low (+1)</b><br>Categorized as E1 per risk assessment above                                 | <b>Moderate (+3)</b><br>Categorized as E2 per risk assessment above          | <b>High (+5)</b><br>Categorized as E3 per risk assessment above                               |
| <b>Composite Education Risk</b><br><i>(Calculated by adding the scores for advocacy, health status and education risk from above)</i> | <b>Low</b><br>[1-2]                                                                            | <b>Moderate</b><br>[3-5]                                                     | <b>High</b><br>[6-+]                                                                          |

**Needs Assessment**

*To be completed with the family*

| <b>Do you feel you need assistance:</b>                                                                                              | Yes | No | Unsure/<br>NA | Notes |
|--------------------------------------------------------------------------------------------------------------------------------------|-----|----|---------------|-------|
| <b>Sharing medical or educational information with your child's school team?</b>                                                     |     |    |               |       |
| <b>Establishing home instruction?</b>                                                                                                |     |    |               |       |
| <b>Requesting or creating a written plan to document your child's needs? (e.g., 504/accommodation plan, health plan, IEP, etc.)</b>  |     |    |               |       |
| <b>Requesting special services at school for your child? (e.g., transportation, medication administration, speech therapy, etc.)</b> |     |    |               |       |
| <b>Amending or updating a current educational plan? (e.g., IEP, 504, etc.)</b>                                                       |     |    |               |       |
| <b>Addressing difficulties with your child's social or extra-curricular</b>                                                          |     |    |               |       |
