# Supplementary material
Source: PubMed Central journal article supplement (PMC7914200)
Supplement: NIHMS1651134-supplement-2.pdf [file NIHMS1651134-supplement-2.pdf]

### Applies to Genotypes: SS and Sβ<sup>0</sup> (and other "severe" genotypes<sup>1</sup>)

Minimum suggested frequency of visits, assessments, and labs.

| Item                              | 0-1     | >1 - 2   | >2 - 3  | >3 - 4  | >4 - 5  | >5 - 6  | >6 - 7  | >7 - 8  | >8 - 9  | >9 - 10 | >10 - 11 | >11 - 12 | >12 - 13 | >13 - 14 | >14 - 15 | >15 - 16 | >16 - 17 | >17 - 18 | >18 - 19 | >19 - 20 | >20 - 21 |         |
|-----------------------------------|---------|----------|---------|---------|---------|---------|---------|---------|---------|---------|----------|----------|----------|----------|----------|----------|----------|----------|----------|----------|----------|---------|
| <b>Clinic Visits</b>              |         |          |         |         |         |         |         |         |         |         |          |          |          |          |          |          |          |          |          |          |          |         |
| Frequency (number)                | q3m (4) | q4m (3)  | q4m (3) | q4m (3) | q4m (3) | q4m (3) | q6m (2)  | q6m (2)  | q6m (2)  | q6m (2)  | q6m (2)  | q6m (2)  | q6m (2)  | q6m (2)  | q6m (2)  | q6m (2)  | q6m (2)  | q6m (2) |
| <b>Education &amp; counseling</b> |         |          |         |         |         |         |         |         |         |         |          |          |          |          |          |          |          |          |          |          |          |         |
| SCD age-specific                  | X       | X        | X       | X       | X       | X       | X       | X       | X       | X       | X        | X        | X        | X        | X        | X        | X        | X        | X        | X        | X        | X       |
| Genetic counseling                | X       |          |         |         |         |         |         |         |         |         |          |          |          |          | X        |          |          |          |          |          |          | X       |
| HPMP                              |         |          |         |         |         | X       | X       | X       | X       | X       | X        | X        | X        | X        | X        | X        | X        | X        | X        | X        | X        | X       |
| <b>Physical assessments</b>       |         |          |         |         |         |         |         |         |         |         |          |          |          |          |          |          |          |          |          |          |          |         |
| Oxygen saturation                 | X       | X        | X       | X       | X       | X       | X       | X       | X       | X       | X        | X        | X        | X        | X        | X        | X        | X        | X        | X        | X        | X       |
| Blood pressure                    | X       | X        | X       | X       | X       | X       | X       | X       | X       | X       | X        | X        | X        | X        | X        | X        | X        | X        | X        | X        | X        | X       |
| Growth assessment                 | X       | X        | X       | X       | X       | X       | X       | X       | X       | X       | X        | X        | X        | X        | X        | X        | X        | X        | X        | X        | X        | X       |
| Pubertal assessment               |         |          |         |         |         |         |         |         |         |         |          | X        | X        | X        | X        | X        | X        | X        | X        | X        | X        |         |
| <b>Medications</b>                |         |          |         |         |         |         |         |         |         |         |          |          |          |          |          |          |          |          |          |          |          |         |
| Penicillin prophylaxis            | X       | X        | X       | X       | X       |         |         |         |         |         |          |          |          |          |          |          |          |          |          |          |          |         |
| Begin/offer hydroxyurea           | X (9mo) | X        | X       | X       | X       | X       | X       | X       | X       | X       | X        | X        | X        | X        | X        | X        | X        | X        | X        | X        | X        | X       |
| Discuss contraception             |         |          |         |         |         |         |         |         |         |         |          |          |          |          | X        | X        | X        | X        | X        | X        | X        | X       |
| <b>Immunizations</b>              |         |          |         |         |         |         |         |         |         |         |          |          |          |          |          |          |          |          |          |          |          |         |
| PPV-23                            |         |          | X       |         |         | X       |         |         |         |         |          |          |          |          |          |          |          |          |          |          |          | X       |
| PCV-13 <sup>2</sup>               | 4 doses |          |         |         |         |         |         |         |         |         |          |          |          |          |          |          |          |          |          |          |          |         |
| Menactra                          |         |          | 2 doses |         |         | X       |         |         |         |         | X        |          |          |          |          | X        |          |          |          |          |          | X       |
| Trumenba                          |         |          |         |         |         |         |         |         |         |         | 3 doses  |          |          |          |          |          |          |          |          |          |          |         |
| Hib <sup>2</sup>                  | 4 doses |          |         |         |         |         |         |         |         |         |          |          |          |          |          |          |          |          |          |          |          |         |
| Influenza                         | 2 doses | X        | X       | X       | X       | X       | X       | X       | X       | X       | X        | X        | X        | X        | X        | X        | X        | X        | X        | X        | X        | X       |
| <b>Imaging</b>                    |         |          |         |         |         |         |         |         |         |         |          |          |          |          |          |          |          |          |          |          |          |         |
| TCD screening                     |         | schedule | X       | X       | X       | X       | X       | X       | X       | X       | X        | X        | X        | X        | X        | X        | X        | X        | X        |          |          |         |
| MRI/A brain screening (unsdated)  |         |          |         |         |         | X       |         |         |         |         | X        |          |          |          |          | X        |          |          |          |          |          | X       |
| Echocardiogram/ECG                |         |          |         |         |         |         |         |         |         |         |          |          |          |          |          |          |          |          |          | X        |          |         |
| <b>Screening tests and exams</b>  |         |          |         |         |         |         |         |         |         |         |          |          |          |          |          |          |          |          |          |          |          |         |
| Retinopathy (dilated exam)        |         |          |         |         |         |         |         |         |         |         | X        |          | X        |          | X        |          | X        |          | X        |          |          | X       |
| Neuropsychological screen         |         |          |         |         |         | X       |         |         |         |         | X        |          |          |          |          | X        |          |          |          |          |          |         |
| Academic attainment assessment    |         |          |         |         |         |         | X       | X       | X       | X       | X        | X        | X        | X        | X        | X        | X        | X        | X        | X        | X        | X       |
| Social work assessment            | 2X      | X        | X       | X       | X       | X       | X       | X       | X       | X       | X        | X        | X        | X        | X        | X        | X        | X        | X        | X        | X        | X       |
| <b>Laboratory testing</b>         |         |          |         |         |         |         |         |         |         |         |          |          |          |          |          |          |          |          |          |          |          |         |
| Globin gene analysis              | X       |          |         |         |         |         |         |         |         |         |          |          |          |          |          |          |          |          |          |          |          |         |
| Hb electrophoresis (diagnostic)   | X       |          |         |         |         |         |         |         |         |         |          |          |          |          |          |          |          |          |          |          |          |         |
| Hb F quantitation (if not on HU)  |         |          |         |         |         | X       |         |         |         |         |          |          |          |          |          |          |          |          |          |          |          | X       |
| RBC genotype                      | X       |          |         |         |         |         |         |         |         |         |          |          |          |          |          |          |          |          |          |          |          |         |
| Urinalysis and microalbumin       |         |          |         |         |         | X       |         |         |         |         | X        | X        | X        | X        | X        | X        | X        | X        | X        | X        | X        | X       |
| CBC, reticulocytes                | X       | 2X       | 2X      | 2X      | 2X      | 2X      | 2X      | 2X      | 2X      | 2X      | 2X       | 2X       | 2X       | 2X       | 2X       | 2X       | 2X       | 2X       | 2X       | 2X       | 2X       | 2X      |
| Chemistries <sup>3</sup>          |         | X        | X       | X       | X       | X       | X       | X       | X       | X       | X        | X        | X        | X        | X        | X        | X        | X        | X        | X        | X        | X       |
| Ferritin <sup>4</sup>             |         |          |         |         |         |         |         |         |         |         | X        |          |          |          |          | X        |          |          |          |          |          | X       |
| HLA typing (full sibs)            | prn     | prn      | prn     | prn     | prn     | prn     | prn     | prn     | prn     | prn     | prn      | prn      | prn      | prn      | prn      | prn      | prn      | prn      | prn      | prn      | prn      | prn     |

<sup>1</sup> SD-Punjab, SO-Arab, et al.

<sup>2</sup> Should be given by PCP

<sup>3</sup> Minimum set (more frequent labs needed for hydroxyurea therapy): BUN, creat, ALT, AST, T/D Bili, Tprot, Alb, vitamin D

<sup>4</sup> Frequency applies to non-chronically transfused patients
